# Supplementary material for: The Pleiotropic Regulator AdpA Regulates the Removal of Excessive Sulfane Sulfur in Streptomyces coelicolor
Source: MDPI journal article supplement (doi:10.3390/antiox12020312), 2023-01-29
Supplement: s1 [file s1]

Table S2. Primers sequence (5'→3') used in this study.

| Primers                     | Sequence (5'-3')          | Function                                                            |
|-----------------------------|---------------------------|---------------------------------------------------------------------|
| hrdB-realtime-f             | CGCCGAGTCCGTCTCTGTCA      | Real-time PCR for reference gene<br>(Gene ID: 1101262)              |
| hrdB-realtime-r             | GCTCTGCGGCACTGACCATC      |                                                                     |
| trxA(sco3889)-realtime-f    | GACTGACGACTCCTTCGAGC      | Real-time PCR for <i>trxA</i> (sco3889)<br>(Gene ID: 1099325)       |
| trxA(sco3889)-realtime-r    | GATGGACATGACGCCGTACT      |                                                                     |
| trxA3/C(sco0885)-realtime-f | GAACTTCGACCAGACGGTCA      | Real-time PCR for <i>trxA3/trxC</i><br>(sco0885) (Gene ID: 1096308) |
| trxA3/C(sco0885)-realtime-r | GCGTCGGGATCGAACTGAT       |                                                                     |
| trxA4(sco5419)-realtime-f   | CCCGGTCGTCATCGACTTC       | Real-time PCR for <i>trxA4</i> (sco5419)<br>(Gene ID: 1100859)      |
| trxA4(sco5419)-realtime-r   | GAGGAAGCGCCCGTTGTATT      |                                                                     |
| trxB(sco3890)-realtime-f    | CGAGCTCATGGACAACATGC      | Real-time PCR for <i>trxB</i> (sco3890)<br>(Gene ID: 1099326)       |
| trxB(sco3890)-realtime-r    | GTCGGTGACGGTCTTGATCT      |                                                                     |
| trxB3(sco7298)-realtime-f   | TGAACGGCATCGAGTTCCTC      | Real-time PCR for <i>trxB3</i> (sco7298)<br>(Gene ID: 1102736)      |
| trxB3(sco7298)-realtime-r   | TGAGCAGGTAGTGGTCCAGA      |                                                                     |
| trxB2(sco6834)-realtime-f   | CCACGACTGAGGTCGAGAAC      | Real-time PCR for <i>trxB2</i> (sco6834)<br>(Gene ID: 1102273)      |
| trxB2(sco6834)-realtime-r   | TCTTGACGTCACCGGTCAGA      |                                                                     |
| trxA5(sco1084)-realtime-f   | ACAGTTCTCCAGTGCCTTCTG     | Real-time PCR for <i>trxA5</i> (sco1084)<br>(Gene ID: 1096507)      |
| trxA5(sco1084)-realtime-r   | GTCGATCTCGACGTGGGC        |                                                                     |
| trxA2(sco5438)-realtime-f   | GAGTTCACCGCCGACTGG        | Real-time PCR for <i>trxA2</i> (sco5438)<br>(Gene ID: 1100878)      |
| trxA2(sco5438)-realtime-r   | ATCGACAGCACCTTGTACGC      |                                                                     |
| adpA-exp-f                  | GTGCCGCGCGGCAGCCATATGAGC  | AdpA recombinant expression<br>(Gene ID: 1098226)                   |
| adpA-exp-r                  | CACGACTCCACCGCCGCGC       |                                                                     |
|                             | GTTAGCAGCCGGATCCTCGAGTCA  |                                                                     |
|                             | CGGCGCGCTGCGCTGGCCCGGG    |                                                                     |
| trxA5(sco1084)EMSA-f        | TACCAGCCTTGGTGCCCGTG      | 155bp fragment for EMSA                                             |
| trxA5(sco1084)EMSA-r        | TCATGGGCGCGCGTCTGCG       |                                                                     |
| trxA3/C (sco0885)EMSA-f     | TTGCTGGGCATGCACGCCAGTA    | 311bp fragment for EMSA                                             |
| trxA3/C (sco0885)EMSA-r     | CTTGGTGAGTTCCACGGTGCTGGT  |                                                                     |
| trxB(sco3890)EMSA-f         | GATCACGTTTCGGACGTCGCTCA   | 334bp fragment for EMSA                                             |
| trxB(sco3890)EMSA-r         | CTACAAGGGCAGGGAAGCCTTGCT  |                                                                     |
| trxA4(sco5419)EMSA-f        | GCTGCTCTGCATCCCCGACCTTA   | 335bp fragment for EMSA                                             |
| trxA4(sco5419)EMSA-r        | AGGTCGACGACCCCGCTCATGGA   |                                                                     |
| trxA2(sco5438)EMSA-f        | GCGGCAGATCAGGACCCTCCAGGA  | 299bp fragment for EMSA                                             |
| trxA2(sco5438)EMSA-r        | AAGTCCGCGTCCGTCACCTCGG    |                                                                     |
| trxB2(sco6834)EMSA-f        | CGCACGTCCTTGGCGGTGCTCATG  | 285bp fragment for EMSA                                             |
|                             | A                         |                                                                     |
| trxB2(sco6834)EMSA-r        | CCGTCGAGGCCATGGCCGAGGT    | 277bp fragment for EMSA                                             |
| trxB3(sco7298)EMSA-f        | TGTCTCCCCGTCGGCCTGTGCCATA |                                                                     |
| trxB3(sco7298)EMSA-r        | TCTCCTCCGAACCGTCCGAGCCTG  |                                                                     |
|                             | C                         |                                                                     |
| pMS82-kp-trxA F             | TCTAAGTAAGGAGACATCTAGTGG  | Complementary <i>trxA</i> by <i>kasOp</i> *<br>promoter             |
|                             | CCGGCACCCCTGAAGCATGTGA    |                                                                     |

|                  |                                                    |                                                          |
|------------------|----------------------------------------------------|----------------------------------------------------------|
| pMS82-kp-trxA R  | TGAAAAACGCTCACTGGTACCTCA<br>GTCGGCGATGAAGTCCTCGA   |                                                          |
| pMS82-kp-trxA3 F | TCTAAGTAAGGAGACATCTAATGA<br>CCAGCACCGTGGAATCACCA   | Complementary <i>trxA3</i> by <i>kasOp</i> *<br>promoter |
| pMS82-kp-trxA3 R | TGAAAAACGCTCACTGGTACCCTA<br>CTGGCCTTCCTGGCCTTCCT   |                                                          |
| pMS82-kp-trxA4 F | TCTAAGTAAGGAGACATCTAATGA<br>GCGGGGTCGTCGACCTCGCCGC | Complementary <i>trxA4</i> by <i>kasOp</i> *<br>promoter |
| pMS82-kp-trxA4 R | TGAAAAACGCTCACTGGTACCCTA<br>GAACAGGGCGCGGGCGAGCG   |                                                          |
| pMS82-kp-trxB F  | TCTAAGTAAGGAGACATCTAGTGA<br>GCGACGTCCGAAACGTGATCA  | Complementary <i>trxB</i> by <i>kasOp</i> *<br>promoter  |
| pMS82-kp-trxB R  | TGAAAAACGCTCACTGGTACCTCA<br>GACGGCGGTCTTCTCGGGCT   |                                                          |

---
