# Supplementary material for: The Pleiotropic Regulator AdpA Regulates the Removal of Excessive Sulfane Sulfur in Streptomyces coelicolor
Source: MDPI journal article supplement (doi:10.3390/antiox12020312), 2023-01-29
Supplement: s1 [file s1]

**Table S1. Strains and plasmids used in this study.**

| Strain or plasmid                   | Description                                                                                                | Resource   |
|-------------------------------------|------------------------------------------------------------------------------------------------------------|------------|
| <b><i>S. coelicolor</i> strains</b> |                                                                                                            |            |
| M145                                | Wild type strain that produces multiple antibiotics, <i>spc1</i> <sup>-</sup> and <i>spc2</i> <sup>-</sup> | Lab stock  |
| $\Delta adpA$                       | M145 strain with disruption of <i>adpA</i> gene, Apr <sup>R</sup>                                          | [1]        |
| $\Delta adpA::adpA$                 | $\Delta adpA$ complemented with pComadpA, Apr <sup>R</sup> , Hyg <sup>R</sup>                              | [1]        |
| $\Delta adpA::pMS82$                | $\Delta adpA$ complemented with pMS82 vector, Apr <sup>R</sup> , Hyg <sup>R</sup>                          | [1]        |
| wt:: <i>trxA4</i>                   | wt complemented with pCom <i>trxA4</i> , Hyg <sup>R</sup>                                                  | This study |
| wt:: <i>trxA</i>                    | wt complemented with pCom <i>trxA</i> , Hyg <sup>R</sup>                                                   | This study |
| wt:: <i>trxB</i>                    | wt complemented with pCom <i>trxB</i> , Hyg <sup>R</sup>                                                   | This study |
| wt:: <i>trxA3</i>                   | wt complemented with pCom <i>trxA3</i> , Hyg <sup>R</sup>                                                  | This study |
| <b><i>E. coli</i> strains</b>       |                                                                                                            |            |
| DH5 $\alpha$                        | Cloning strain                                                                                             | Lab stock  |
| BL21 (DE3)                          | Host used for protein expression                                                                           | Lab stock  |
| ET12567(pUZ8002)                    | Strain used for conjugation, with plasmid pUZ8002, Km <sup>R</sup> , Cm <sup>R</sup>                       | Lab stock  |
| BL21 (DE3)AdpA                      | Protein expression host with pET-AdpA, Amp <sup>R</sup>                                                    | This study |
| <b>Plasmids</b>                     |                                                                                                            |            |
| pJTU1278                            | The shuttle vector for gene mutation, Amp <sup>R</sup>                                                     | Lab stock  |
| pJTU- <i>adpA</i>                   | pJTU1278 derivative for <i>adpA</i> disruption, Apr <sup>R</sup> , Amp <sup>R</sup>                        | [1]        |
| pIJ773                              | Template for apramycin resistance gene, Apr <sup>R</sup>                                                   | Lab stock  |
| pET-15b                             | Expression vector for proteins, Amp <sup>R</sup>                                                           | Lab stock  |
| pEX-AdpA                            | <i>adpA</i> expression vector, Amp <sup>R</sup>                                                            | [1]        |
| pMS82                               | Integrative vector for gene complementation, Hyg <sup>R</sup>                                              | Lab stock  |
| pMS82- <i>trxA4</i>                 | pMS82 derivative for <i>trxA4</i> ( <i>sco5419</i> ) gene complementation, Hyg <sup>R</sup>                | This study |
| pMS82- <i>trxA</i>                  | pMS82 derivative for <i>trxA</i> ( <i>sco3889</i> ) gene complementation, Hyg <sup>R</sup>                 | This study |
| pMS82- <i>trxB</i>                  | pMS82 derivative for <i>trxB</i> ( <i>sco3890</i> ) gene complementation, Hyg <sup>R</sup>                 | This study |
| pMS82- <i>trxA3</i>                 | pMS82 derivative for <i>trxA3</i> ( <i>sco0885</i> ) gene complementation, Hyg <sup>R</sup>                | This study |

1. Lu, T.; Wu, X.; Cao, Q.; Xia, Y.; Xun, L.; Liu, H. Sulfane sulfur posttranslationally modifies the global regulator AdpA to influence actinorhodin production and morphological differentiation of *Streptomyces coelicolor*. *mBio* **2022**, *13*, e0386221.
